# Supplementary material
Source: PubMed Central journal article supplement (PMC6136966)
Supplement: NIHMS980341-supplement-Appendix.pdf [file NIHMS980341-supplement-Appendix.pdf]

## Appendix

Table A1: Comparison of baseline characteristics of study participants included and excluded in the analysis stratified by birth period

|                                                | Included      |               | Excluded               |                    |                     | p <sup>*1</sup> |
|------------------------------------------------|---------------|---------------|------------------------|--------------------|---------------------|-----------------|
|                                                | Pre-OB+       | OB+           | Pre-OB+<br>(n = 1,318) | OB+<br>(n = 8,008) | Unknown<br>(n = 29) |                 |
| <b>HIV result</b>                              |               |               |                        |                    |                     |                 |
| Infected/unknown                               | NA            | NA            | 721 (54.7)             | 3,583 (44.7)       | 0                   |                 |
| Uninfected                                     | 784 (100.0)   | 6,061 (100.0) | 597 (45.3)             | 4,425 (55.3)       | 29 (100.0)          |                 |
| <b>Age at enrolment (months), median (IQR)</b> | 4.0 (2.0-9.0) | 2.0 (1.0-2.0) | 8.0 (4.0-13.0)         | 2.0 (1.0-3.0)      | 0                   | <0.0001         |
| <b>Gender</b>                                  |               |               |                        |                    |                     |                 |
| Male                                           | 393 (50.1)    | 2,997 (49.5)  | 618 (46.9)             | 3,514 (43.9)       | 13 (44.8)           |                 |
| Female                                         | 391 (49.9)    | 3,064 (50.6)  | 620 (47.0)             | 3,697 (46.2)       | 12 (41.4)           |                 |
| Unknown                                        | NA            | NA            | 80 (6.1)               | 797 (10.0)         | 4 (13.8)            | 0.452           |
| <b>PEP at birth</b>                            |               |               |                        |                    |                     |                 |
| No                                             | 136 (17.4)    | 398 (6.6)     | 315 (23.9)             | 987 (12.3)         | 5 (17.2)            |                 |
| Yes                                            | 596 (76.0)    | 5,403 (89.1)  | 831 (63.1)             | 6,459 (80.7)       | 17 (58.6)           |                 |
| Unknown                                        | 52 (6.6)      | 260 (4.3)     | 172 (13.1)             | 562 (7.0)          | 7 (24.1)            | <0.0001         |
| <b>Birth weight (kg)</b>                       |               |               |                        |                    |                     |                 |
| <2.5                                           | 97 (12.4)     | 726 (12.0)    | 74 (5.6)               | 480 (6.0)          | 3 (10.3)            |                 |
| ≥2.5                                           | 687 (87.6)    | 5,335 (88.0)  | 536 (40.7)             | 3,274 (40.9)       | 13 (44.8)           |                 |
| Unknown                                        | NA            | NA            | 708 (53.7)             | 4,254 (53.1)       | 13 (44.8)           | 0.275           |
| Median (IQR)                                   | 3.0 (2.8-3.4) | 3.0 (2.7-3.4) | 3.0 (2.8-3.5)          | 3.0 (2.7-3.4)      | 3.0 (2.8-4.0)       | 0.138           |
| <b>In-utero antiretroviral exposure,</b>       |               |               |                        |                    |                     |                 |
| No antiretrovirals                             | 109 (13.9)    | 355 (5.9)     | 280 (21.2)             | 915 (11.4)         | 3 (10.3)            |                 |
| Mono- or dual-therapy at any stage             | 125 (15.9)    | NA            | 273 (20.7)             | NA                 | 2 (6.9)             |                 |
| ART <4 weeks at any stage                      | 172 (21.9)    | 665 (11.0)    | 266 (20.2)             | 906 (11.3)         | 2 (6.9)             |                 |
| ART ≥4 weeks at any stage                      | 331 (42.2)    | 4,489 (74.1)  | 372 (28.2)             | 5,187 (64.8)       | 15 (51.7)           |                 |
| Unknown                                        | 47 (6.0)      | 552 (9.1)     | 127 (9.6)              | 1,000 (12.5)       | 7 (24.1)            | <0.0001         |
| <b>Mother's postpartum status</b>              |               |               |                        |                    |                     |                 |
| No ART                                         | 84 (10.7)     | 93 (1.5)      | 298 (22.6)             | 346 (4.3)          | 2 (6.9)             |                 |
| ART                                            | 590 (75.3)    | 5,686 (93.8)  | 818 (62.1)             | 6,751 (84.3)       | 11 (37.9)           |                 |
| ART with interruptions <sup>#</sup>            | 102 (13.0)    | 262 (4.3)     | 109 (8.3)              | 245 (3.1)          | 0                   |                 |
| Died                                           | 3 (0.4)       | 6 (0.1)       | 6 (0.5)                | 56 (0.7)           | 0                   | <0.0001         |

<sup>1</sup> For simplicity, we only show the p-values comparing included and excluded infants combining both periods, but exactly the same variables were significantly different also if we restricted the comparison to either birth period

|                                    |            |              |            |              |            |         |
|------------------------------------|------------|--------------|------------|--------------|------------|---------|
| Unknown                            | 5 (0.6)    | 14 (0.2)     | 87 (6.6)   | 610 (7.6)    | 16 (55.2)  |         |
| <b>Outcome at end of follow-up</b> |            |              |            |              |            |         |
| Lost to follow-up                  | 379 (48.3) | 1,906 (31.5) | 888 (67.4) | 3,426 (42.8) | 0          |         |
| Discharged                         | 362 (46.2) | 975 (16.1)   | 236 (17.9) | 711 (8.9)    | 0          |         |
| Dead                               | 6 (0.8)    | 21 (0.4)     | 11 (0.8)   | 57 (0.7)     | 0          |         |
| Transferred out                    | 13 (1.7)   | 114 (1.9)    | 19 (1.4)   | 101 (1.3)    | 0          |         |
| Under follow-up                    | 24 (3.1)   | 3,045 (50.2) | 164 (12.4) | 3,713 (46.4) | 29 (100.0) | <0.0001 |
| <b>Facility type</b>               |            |              |            |              |            |         |
| Central hospital                   | 100 (12.8) | 537 (8.8)    | 137 (10.4) | 802 (10.0)   | 3 (10.3)   |         |
| Health centre                      | 60 (7.7)   | 943 (15.6)   | 161 (12.2) | 956 (11.9)   | 5 (17.2)   |         |
| Faith-based hospital               | 105 (13.4) | 520 (8.6)    | 66 (5.0)   | 468 (5.8)    | 4 (13.8)   |         |
| District hospital                  | 519 (66.2) | 4,061 (67.0) | 954 (72.4) | 5,782 (72.2) | 17 (58.6)  | <0.0001 |

ART: Antiretroviral therapy; PEP: Post exposure prophylaxis (children received zidovudine (AZT) in pre-Option B+ and nevirapine (NVP) during Option B+); IQR: Interquartile range.

Data represent number (%) of women unless otherwise indicated

\*P values from Chi-square test compares baseline characteristics of included and excluded infants. Missing values were excluded when calculating the p-values

#Represents women who missed some ART visits to the health facility

Table A2 a: Linear regression analysis of WAZ at birth: Pre-Option B+

|                                         | Univariable (n=784) |               |                      | Multivariable (n=737) |               |                      |
|-----------------------------------------|---------------------|---------------|----------------------|-----------------------|---------------|----------------------|
|                                         | $\beta$             | 95% CI        | P-value <sup>#</sup> | $\beta$               | 95% CI        | P-value <sup>#</sup> |
| <b>Gender</b>                           |                     |               |                      |                       |               |                      |
| Male                                    | 0                   |               | 0.987                | 0                     |               | 0.740                |
| Female                                  | -0.002              | -0.201; 0.198 |                      | -0.035                | -0.242; 0.172 |                      |
| <b>In-utero antiretroviral exposure</b> |                     |               |                      |                       |               |                      |
| No antiretrovirals                      | 0                   |               | 0.433                | 0                     |               | 0.283                |
| Mono- or dual-therapy at any stage      | 0.278               | -0.088; 0.644 |                      | 0.342                 | -0.033; 0.716 |                      |
| ART <4weeks at any stage                | 0.137               | -0.205; 0.479 |                      | 0.157                 | -0.185; 0.500 |                      |
| ART $\geq$ 4weeks at any stage          | 0.068               | -0.240; 0.377 |                      | 0.089                 | -0.222; 0.400 |                      |
| <b>Facility type</b>                    |                     |               |                      |                       |               |                      |
| Central hospital                        | 0                   |               | 0.225                | 0                     |               | 0.112                |
| Health centre                           | 0.454               | -0.001; 0.909 |                      | 0.526                 | 0.052; 1.001  |                      |
| Faith based hospital                    | 0.044               | -0.345; 0.434 |                      | 0.001                 | -0.400; 0.401 |                      |
| District hospital                       | 0.134               | -0.170; 0.438 |                      | 0.165                 | -0.148; 0.478 |                      |

ART: Antiretroviral therapy; CI: Confidence interval

<sup>#</sup> P values from likelihood ratio test

Table A2 b: Linear regression analysis of WAZ at birth: Option B+

|                                         | Univariable (n=6,061) |               |                      | Multivariable (n=5,509) |               |                      |
|-----------------------------------------|-----------------------|---------------|----------------------|-------------------------|---------------|----------------------|
|                                         | $\beta$               | 95% CI        | P-value <sup>#</sup> | $\beta$                 | 95% CI        | P-value <sup>#</sup> |
| <b>Gender</b>                           |                       |               |                      |                         |               |                      |
| Male                                    | 0                     |               | 0.917                | 0                       |               | 0.857                |
| Female                                  | 0.004                 | -0.067; 0.074 |                      | -0.007                  | -0.079; 0.066 |                      |
| <b>In-utero antiretroviral exposure</b> |                       |               |                      |                         |               |                      |
| No antiretrovirals                      | 0                     |               | 0.157                | 0                       |               | 0.147                |
| ART <4weeks at any stage                | -0.156                | -0.333; 0.022 |                      | -0.161                  | -0.338; 0.016 |                      |
| ART $\geq$ 4weeks at any stage          | -0.142                | -0.291; 0.006 |                      | -0.144                  | -0.293; 0.005 |                      |
| <b>Facility type</b>                    |                       |               |                      |                         |               |                      |
| Central hospital                        | 0                     |               | 0.001                | 0                       |               | 0.001                |
| Health centre                           | 0.251                 | 0.104; 0.399  |                      | 0.264                   | 0.116; 0.413  |                      |
| Faith based hospital                    | 0.016                 | -0.152; 0.185 |                      | 0.030                   | -0.141; 0.201 |                      |
| District hospital                       | 0.158                 | 0.032; 0.283  |                      | 0.135                   | 0.009; 0.261  |                      |

ART: Antiretroviral therapy; CI: Confidence interval

<sup>#</sup> P values from likelihood ratio test

Table A3 a: Mixed-effects model of weight-for-age z-scores (WAZ) over time (0-24 months): Pre-Option B+

|                                         | Univariable* |               |                      | Multivariable** |               |                      |
|-----------------------------------------|--------------|---------------|----------------------|-----------------|---------------|----------------------|
|                                         | $\beta$      | 95% CI        | P-value <sup>#</sup> | $\beta$         | 95% CI        | P-value <sup>#</sup> |
| <b>Gender</b>                           |              |               |                      |                 |               |                      |
| Male                                    | 0            |               | 0.269                | 0               |               | 0.073                |
| Female                                  | 0.096        | -0.074; 0.266 |                      | 0.157           | -0.014; 0.329 |                      |
| <b>Birth weight</b>                     |              |               |                      |                 |               |                      |
| <2.5kg                                  | 0            |               | <0.0001              | 0               |               | <0.0001              |
| ≥2.5kg                                  | 0.759        | 0.504; 1.015  |                      | 0.759           | 0.495; 1.022  |                      |
| <b>In-utero antiretroviral exposure</b> |              |               |                      |                 |               |                      |
| No antiretrovirals                      | 0            |               | 0.161                | 0               |               | 0.118                |
| Mono- or dual-therapy at any stage      | 0.140        | -0.173; 0.453 |                      | 0.118           | -0.195; 0.432 |                      |
| ART <4weeks at any stage                | 0.081        | -0.211; 0.373 |                      | 0.040           | -0.246; 0.327 |                      |
| ART ≥4weeks at any stage                | -0.124       | -0.386; 0.139 |                      | -0.153          | -0.411; 0.106 |                      |
| <b>Facility type</b>                    |              |               |                      |                 |               |                      |
| Central hospital                        | 0            |               | 0.404                | 0               |               | 0.218                |
| Health centre                           | 0.193        | -0.199; 0.585 |                      | 0.138           | -0.257; 0.532 |                      |
| Faith based hospital                    | -0.147       | -0.480; 0.186 |                      | -0.259          | -0.591; 0.072 |                      |
| District hospital                       | -0.009       | -0.269; 0.251 |                      | -0.059          | -0.317; 0.199 |                      |

ART: Antiretroviral therapy; 95% CI: 95% confidence interval

<sup>#</sup> P values from a likelihood ratio test

\* The univariable model assessed the association between WAZ and each variable individually with inclusion of the polynomial transformation of age.

\*\* The multivariable model assessed the association between WAZ and birth period adjusting for all independent variables and the polynomial transformation of age.

Table A3 b: Mixed-effects model of weight-for-age z-scores (WAZ) over time (0-24 months): Option

B+

|                                         | Univariable* |                |          | Multivariable** |                |          |
|-----------------------------------------|--------------|----------------|----------|-----------------|----------------|----------|
|                                         | $\beta$      | 95% CI         | P-value# | $\beta$         | 95% CI         | P-value# |
| <b>Gender</b>                           |              |                |          |                 |                |          |
| Male                                    | 0            |                | 0.0003   | 0               |                | <0.0001  |
| Female                                  | 0.109        | 0.052; 0.166   |          | 0.123           | 0.066; 0.181   |          |
| <b>Birth weight</b>                     |              |                |          |                 |                |          |
| <2.5kg                                  | 0            |                | <0.0001  | 0               |                | <0.0001  |
| $\geq$ 2.5kg                            | 1.132        | 1.048; 1.215   |          | 1.141           | 1.053; 1.230   |          |
| <b>In-utero antiretroviral exposure</b> |              |                |          |                 |                |          |
| No antiretrovirals                      | 0            |                | 0.196    | 0               |                | 0.185    |
| ART <4weeks at any stage                | 0.040        | -0.108; 0.187  |          | 0.057           | -0.084; 0.197  |          |
| ART $\geq$ 4weeks at any stage          | -0.043       | -0.167; 0.081  |          | -0.026          | -0.144; 0.092  |          |
| <b>Facility type</b>                    |              |                |          |                 |                |          |
| Central hospital                        | 0            |                | <0.0001  | 0               |                | <0.0001  |
| Health centre                           | -0.096       | -0.216; 0.023  |          | -0.098          | -0.215; 0.018  |          |
| Faith based hospital                    | -0.325       | -0.460; -0.189 |          | -0.314          | -0.449; -0.180 |          |
| District hospital                       | -0.130       | -0.231; -0.030 |          | -0.152          | -0.251; -0.054 |          |

ART: Antiretroviral therapy; CI: Confidence interval

# P values from a likelihood ratio test

\*The univariable model assessed the association between WAZ and each variable individually with inclusion of the polynomial transformation of age.

\*\* The multivariable model assessed the association between WAZ and birth period adjusting for all independent variables and the polynomial transformation of age.
